# Supplementary material for: Reactive Organic Carbon Air Emissions from Mobile Sources in the United States
Source: Copernicus journal article supplement (doi:10.5194/egusphere-2023-855), 2023-05-15
Supplement: Supplementary file 1 [file egusphere-2023-855-supplement.zip]

Archive with 2 entries (2 files):
- Murphy_MobileRoc_2022_SupportInfo.pdf
- Murphy_MobileROC_Supporting_Tables.xlsx
